# Supplementary material for: Application of One-Step Reverse Transcription Droplet Digital PCR for Dengue Virus Detection and Quantification in Clinical Specimens
Source: MDPI journal article supplement (doi:10.3390/diagnostics11040639), 2021-04-01
Supplement: s1 [file s1]

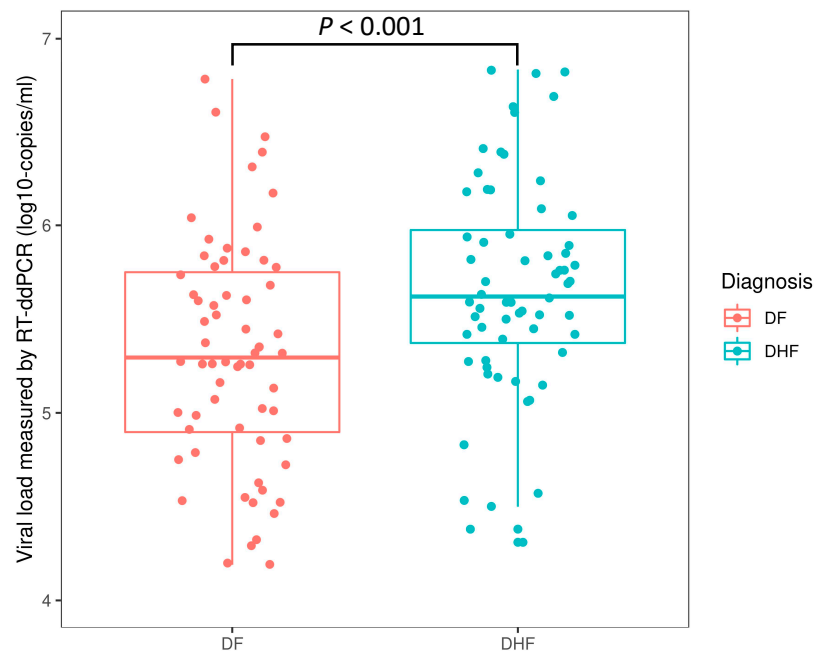

**Figure S5. DENV levels grouped by disease severity**

A boxplot overlaid with a scatter plot shows DENV levels grouped by disease severity. The difference of DENV levels between DF and DHF is significant ( $P < 0.001$ ) based on a multivariate regression analysis to subtract the effect of serotype and day of illness on DENV levels.
