# Supplementary material for: Application of One-Step Reverse Transcription Droplet Digital PCR for Dengue Virus Detection and Quantification in Clinical Specimens
Source: MDPI journal article supplement (doi:10.3390/diagnostics11040639), 2021-04-01
Supplement: s1 [file s1]

```

      10270      10280      10290      10300      10310      10320
pGem3UTRD4-M14931 (10261-10620)  ....|....|....|....|....|....|....|....|....|....|
tgtaattaccaacaacaacaccaaaggctattgaagtcaggccacttggtccacgggttt

      10330      10340      10350      10360      10370      10380
pGem3UTRD4-M14931 (10261-10620)  ....|....|....|....|....|....|....|....|....|....|
gagcaaacggtgctgcctgtagctccgccaaataatgggaggcgtaataatccccaggag

      10390      10400      10410      10420      10430      10440
pGem3UTRD4-M14931 (10261-10620)  ....|....|....|....|....|....|....|....|....|....|
gccatgcgcgcgaagctgtacgcgtggcatattggactagcggtagaggagaccct

      10450      10460      10470      10480      10490      10500
pGem3UTRD4-M14931 (10261-10620)  ....|....|....|....|....|....|....|....|....|....|
cccatcactgacaaaacgcagcaaaagggggcccgaaagccaggagggaagctgtactcctg

      10510      10520      10530      10540      10550      10560
pGem3UTRD4-M14931 (10261-10620)  ....|....|....|....|....|....|....|....|....|....|
gtggaaggactagaggtttagaggagcccccccaacacaaaacagcatattgacgctggg

      10570      10580      10590      10600      10610      10620
pGem3UTRD4-M14931 (10261-10620)  ....|....|....|....|....|....|....|....|....|....|
aaagaccagagatcctgctgtctctgcaacatcaatccaggcacagagcgcgcaagatg

```

**Figure S1. The sequence of the 3'UTR conserved region of DENV4**

The sequence of the 3'UTR conserved region of DENV4 cloned into pGem3UTRD4-M14931 is shown.
