# Supplementary material for: Application of One-Step Reverse Transcription Droplet Digital PCR for Dengue Virus Detection and Quantification in Clinical Specimens
Source: MDPI journal article supplement (doi:10.3390/diagnostics11040639), 2021-04-01
Supplement: s1 [file s1]

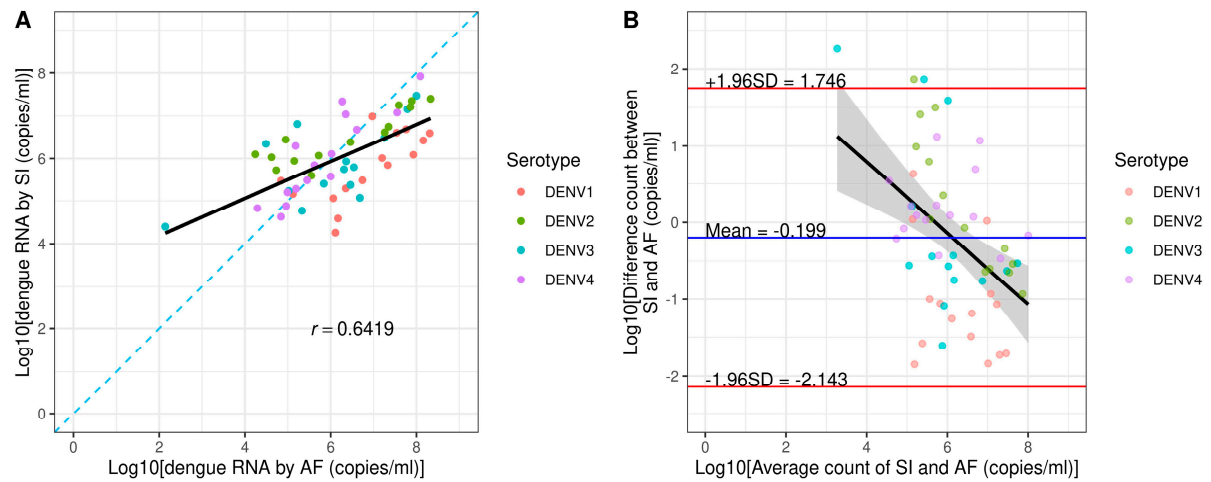

**Figure S4. Interlaboratory variations of qRT-PCR**

(A) A regression line (black line) shows the correlation between dengue RNA from clinical samples measured by qRT-PCR by two laboratories with different protocols: SI and AFRIMS (AF). A diagonal line (blue) represents a hypothetical trend where results by the two methods are identical. (B) A Bland-Altman plot of qRT-PCR results between AF and SI laboratories. A horizontal blue line shows mean difference between two methods (bias). Horizontal red lines show a range of agreement limits
