# Supplementary material for: Application of One-Step Reverse Transcription Droplet Digital PCR for Dengue Virus Detection and Quantification in Clinical Specimens
Source: MDPI journal article supplement (doi:10.3390/diagnostics11040639), 2021-04-01
Supplement: s1 [file s1]

**Table S1. Raw quantification results for determining lower limit of detection (LLOD<sub>95</sub>) and lower limit of quantification (LLOQ). Lower limit of detection (LLOD<sub>95</sub>) and lower limit of quantification (LLOQ) were determined by serial dilution of *in vitro* transcribed RNA standards. The experiment was done in triplicate with three separate runs**

| Expected <sup>c</sup><br>(copies) | Dilution  | Anticipated <sup>d</sup><br>(log10-copies) | Number of measurement (log10-copies) <sup>b</sup> |      |      |                 |                 |                 |                 |                 |                 | Mean | SD   | %CV    |
|-----------------------------------|-----------|--------------------------------------------|---------------------------------------------------|------|------|-----------------|-----------------|-----------------|-----------------|-----------------|-----------------|------|------|--------|
|                                   |           |                                            | 1                                                 | 2    | 3    | 4               | 5               | 6               | 7               | 8               | 9               |      |      |        |
| 10 <sup>5</sup>                   | Undiluted | 4.67                                       | 4.78                                              | 4.78 | 4.74 | 4.53            | 4.72            | 4.74            | 4.54            | 4.59            | 4.63            | 4.67 | 0.10 | 2.15   |
| 10 <sup>4</sup>                   | 1:10      | 3.67                                       | 3.44                                              | 3.36 | 3.35 | 3.15            | 3.34            | 3.36            | 3.25            | 3.26            | 3.32            | 3.31 | 0.08 | 2.51   |
| 10 <sup>3</sup>                   | 1:100     | 2.67                                       | 2.11                                              | 2.14 | 2.03 | 1.87            | 1.97            | 2.13            | 1.88            | 2.03            | 1.99            | 2.02 | 0.10 | 4.95   |
| 10 <sup>2</sup>                   | 1:1000    | 1.67                                       | 0.62                                              | 0.91 | 1.03 | 0.48            | 1.26            | 0.88            | 2.01            | 0.58            | 0.58            | 0.93 | 0.48 | 51.53  |
| 50                                | 1:2000    | 1.37                                       | 0.62                                              | 0.58 | 0.94 | 0.01            | NC <sup>a</sup> | NC <sup>a</sup> | 0.48            | 0.08            | 0.72            | 0.38 | 0.34 | 89.41  |
| 10                                | 1:10000   | 0.67                                       | NC <sup>a</sup>                                   | 0.45 | 0.48 | NC <sup>a</sup> | NC <sup>a</sup> | 0.20            | 0.26            | NC <sup>a</sup> | 0.15            | 0.17 | 0.15 | 87.12  |
| 5                                 | 1:20000   | 0.37                                       | 0.73                                              | 0.75 | 0.15 | 0.26            | NC <sup>a</sup> | NC <sup>a</sup> | NC <sup>a</sup> | 0.15            | NC <sup>a</sup> | 0.23 | 0.31 | 137.03 |

<sup>a</sup>NC = No call for positive droplets were not detected.

<sup>b</sup>Number of measurement (log copies/reaction) = Measured concentration by RT-ddPCR/reaction total volume of 20 µl

<sup>c</sup>Conc. = Estimated concentration calculated by Qubit® 2.0 fluorometer.

<sup>d</sup>Anticipated Concentrations = Concentrations calculated as previously described by Persson et al [26]
