# Supplementary material for: Application of One-Step Reverse Transcription Droplet Digital PCR for Dengue Virus Detection and Quantification in Clinical Specimens
Source: MDPI journal article supplement (doi:10.3390/diagnostics11040639), 2021-04-01
Supplement: s1 [file s1]

**Table S2. DENV detection results of qRT-ddPCR and qRT-PCR by serotype.**

|                   |                   | Positive qRT-PCR | Negative qRT-PCR |
|-------------------|-------------------|------------------|------------------|
| DENV1<br>(n = 40) | Positive RT-ddPCR | 38               | 1                |
|                   | Negative RT-ddPCR | 0                | 1                |
| DENV2<br>(n = 40) | Positive RT-ddPCR | 37               | 0                |
|                   | Negative RT-ddPCR | 0                | 3                |
| DENV3<br>(n = 40) | Positive RT-ddPCR | 29               | 7                |
|                   | Negative RT-ddPCR | 1                | 3                |
| DENV4<br>(n = 36) | Positive RT-ddPCR | 36               | 0                |
|                   | Negative RT-ddPCR | 0                | 0                |
